# Supplementary material for: Efficacy of CNT-bound polyelectrolyte membrane by spray-assisted layer-by-layer (LbL) technique on water purification
Source: Royal Society of Chemistry journal article supplement (doi:10.1039/c4ra05272b), 2014-01-01
Supplement: c4ra05272b1.pdf [file c4ra05272b1.pdf]

## Supporting information

### Efficacy of CNTs bound polyelectrolyte membrane by spray-assisted layer-by-layer (LbL) technique on water purification

Lei Liu <sup>a</sup>, Moon Son <sup>a</sup>, Hosik Park <sup>b</sup>, Evrim Celik <sup>c</sup>,

Chiranjib Bhattacharjee <sup>d</sup>, and Heechul Choi <sup>\*a</sup>

<sup>a</sup> School of Environmental Science and Engineering, Gwangju Institute of Science and Technology (GIST), 261 Cheomdangwagi-ro, 1 Oryong-dong, Buk-gu, Gwangju 500712, Republic of Korea.

Fax: +82 62 7152434; Tel: +82 62 7152576; E-mail: hcchoi@gist.ac.kr

<sup>b</sup> Research Center for Environmental Resources and Processes, Korea Research Institute of Chemical Technology (KRICT), Daejeon 305600, Republic of Korea.

<sup>c</sup> Department of Environmental Engineering, Faculty of Engineering, Suleyman Demirel University, Isparta 32260, Turkey.

<sup>d</sup> Department of Chemical Engineering, Jadavpur University, 188, Raja Subodh Chandra Mullick Road, Kolkata 700032, India.

### Table of contents

**Fig. S1** Zeta potential of bare and surface-modified membranes with different number of bilayers.

**Fig. S2** The fouled membrane by 20 mg/L humic acid after 20 mins DI water flushing (a) bare membrane, (b) M3.5-4 %, (c) M6.5-4 % without Ca<sup>2+</sup>; (d) bare membrane, (e) M3.5-4 %, (f) M6.5-4 % with 0.2 mM Ca<sup>2+</sup>

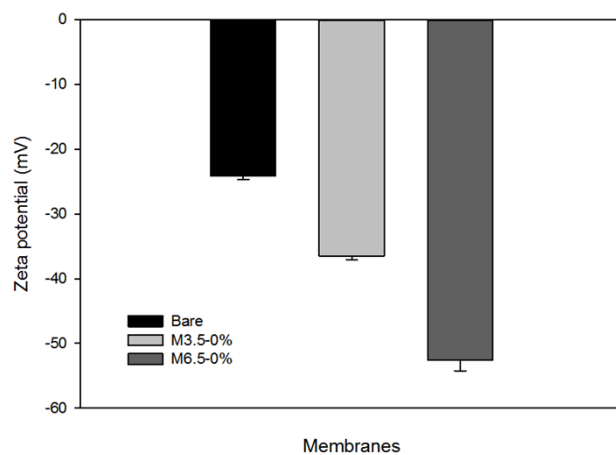

**Fig. S1** Zeta potential of bare and surface-modified membranes with different number of bilayers.

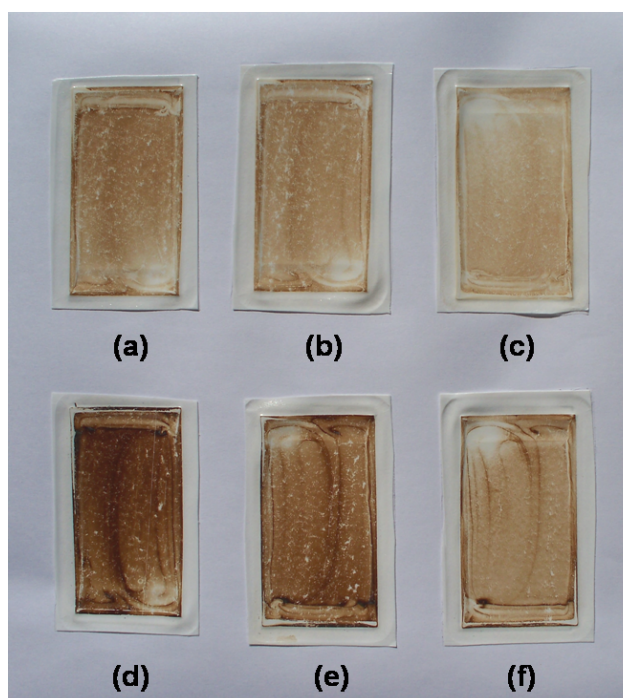

**Fig. S2** The fouled membrane by 20 mg/L humic acid after 20 mins DI water flushing (a) bare membrane, (b) M3.5-4 %, (c) M6.5-4 % without  $\text{Ca}^{2+}$ ; (d) bare membrane, (e) M3.5-4 %, (f) M6.5-4 % with 0.2 mM  $\text{Ca}^{2+}$
